# Supplementary material for: Biotechnology and mineral processing : fundaments of bacterial leaching processes
Source: Royal Society of Chemistry journal article supplement (doi:10.1039/c2dt31376f), 1990-01-01
Supplement: c2dt31376f.pdf [file c2dt31376f.pdf]

## Supplementary Information

Micro/nano-structured  $\text{CaWO}_4/\text{Bi}_2\text{WO}_6$  composite: synthesis,  
characterization and photocatalytic properties for degradation of  
organic contaminants

Yadan Guo<sup>1</sup>, Gaoke Zhang<sup>1\*</sup>, Huihui Gan<sup>1</sup>, Yalei Zhang<sup>2\*</sup>

1. *School of Resources and Environmental Engineering, Wuhan University of  
Technology, Wuhan, 430070, China*

2. *State Key Laboratory of Pollution Control and Resource Reuse, College of  
Environmental Science and Engineering, Tongji University, Shanghai 200092, China*

\*Corresponding author. Tel: 86-27-87651816; fax: 86-27-87887445.

E-mail: gkzhang@whut.edu.cn; zhangyalei06@126.com.

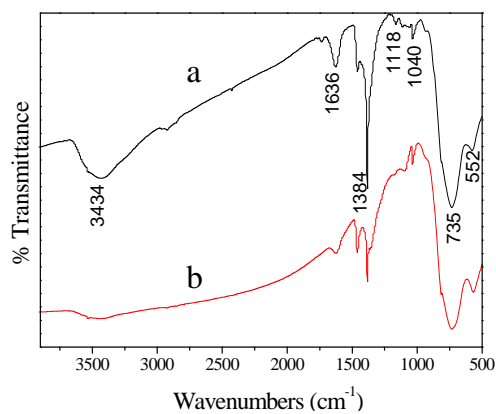

**Fig. S1** FT-IR spectra of the 0.10C-B catalyst (a) before and (b) after photocatalytic reaction.

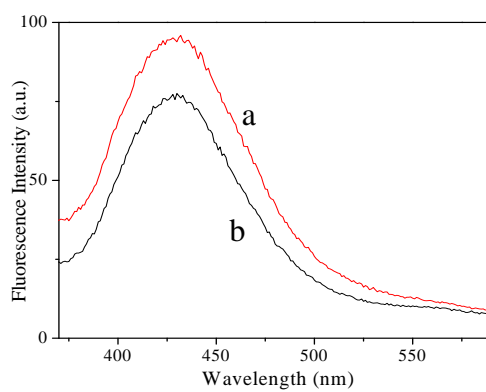

**Fig. S2** The room temperature photoluminescence (PL) spectra of (a) the pure Bi<sub>2</sub>WO<sub>6</sub> and (b) the 0.10C-B catalyst ( $\lambda_{EX} = 312$  nm).
